# Supplementary material
Source: PubMed Central journal article supplement (PMC8898026)

**Supplementary Table I** Distribution of participants among the subdistricts of Rio de Janeiro, stratified by virologic and non-virologic suppression

| <b>Subdistrict</b>  | <b>Virologic suppression</b><br>n= 2214 (83.9%) | <b>Non-virologic suppression</b><br>n= 425 (16.1%) | <b>Total</b><br>n= 2639 (100%) | <b>Area</b><br>(km <sup>2</sup> ) | <b>Population</b><br>(people) | <b>Population density</b><br>(people/km <sup>2</sup> ) |
|---------------------|-------------------------------------------------|----------------------------------------------------|--------------------------------|-----------------------------------|-------------------------------|--------------------------------------------------------|
| Rio De Janeiro City | 1463 (66.0)                                     | 292 (68.7)                                         | 1755 (66.5)                    |                                   |                               |                                                        |
| Anchieta            | 48 (2.2)                                        | 9 (2.1)                                            | 57 (2.2)                       | 14.02                             | 158,318                       | 11,292.30                                              |
| Bangu               | 83 (3.7)                                        | 14 (3.3)                                           | 97 (3.7)                       | 42.31                             | 428,035                       | 10,116.64                                              |
| Barra Da Tijuca     | 52 (2.3)                                        | 5 (1.2)                                            | 57 (2.2)                       | 106.09                            | 300,823                       | 2,835.54                                               |
| Botagofo            | 44 (2)                                          | 9 (2.1)                                            | 53 (2)                         | 12.07                             | 239,729                       | 19,861.56                                              |
| Campo Grande        | 86 (3.9)                                        | 21 (4.9)                                           | 107 (4.1)                      | 107.64                            | 542,084                       | 5,036.08                                               |
| Centro              | 50 (2.3)                                        | 10 (2.4)                                           | 60 (2.3)                       | 5.35                              | 41,142                        | 7,690.09                                               |
| Cidade De Deus      | 10 (0.5)                                        | 2 (0.5)                                            | 12 (0.5)                       | 1.21                              | 37,730                        | 31,181.82                                              |
| Complexo Do Alemao  | 10 (0.5)                                        | 6 (1.4)                                            | 16 (0.6)                       | 2.42                              | 69,143                        | 28,571.49                                              |
| Copacabana          | 50 (2.3)                                        | 17 (4)                                             | 67 (2.5)                       | 4.18                              | 161,191                       | 38,562.44                                              |
| Guaratiba           | 15 (0.7)                                        | 4 (0.9)                                            | 19 (0.7)                       | 130.35                            | 123,114                       | 944.49                                                 |
| Ilha De Paqueta     | 1 (0)                                           | 0 (0)                                              | 1 (0)                          | 1.56                              | 3,361                         | 2,154.49                                               |
| Ilha Do Governador  | 42 (1.9)                                        | 6 (1.4)                                            | 48 (1.8)                       | 41.31                             | 212,574                       | 5,145.82                                               |
| Inhauma             | 41 (1.9)                                        | 10 (2.4)                                           | 51 (1.9)                       | 10.00                             | 134,349                       | 13,434.90                                              |
| Iraja               | 55 (2.5)                                        | 9 (2.1)                                            | 64 (2.4)                       | 14.23                             | 202,952                       | 14,262.26                                              |
| Jacarepagua         | 116 (5.2)                                       | 17 (4)                                             | 133 (5)                        | 74.58                             | 521,542                       | 6,993.05                                               |
| Jacarezinho         | 6 (0.3)                                         | 2 (0.5)                                            | 8 (0.3)                        | 0.94                              | 37,839                        | 40,254.26                                              |
| Lagoa               | 16 (0.7)                                        | 7 (1.6)                                            | 23 (0.9)                       | 14.38                             | 167,774                       | 11,667.18                                              |
| Madureira           | 106 (4.8)                                       | 15 (3.5)                                           | 121 (4.6)                      | 26.56                             | 371,968                       | 14,004.82                                              |
| Mare                | 38 (1.7)                                        | 8 (1.9)                                            | 46 (1.7)                       | 4.11                              | 129,770                       | 31,574.21                                              |
| Meier               | 83 (3.7)                                        | 24 (5.6)                                           | 107 (4.1)                      | 2.40                              | 399,358                       | 166,399.17                                             |
| Pavuna              | 50 (2.3)                                        | 11 (2.6)                                           | 61 (2.3)                       | 17.31                             | 158,318                       | 9,146.04                                               |
| Penha               | 56 (2.5)                                        | 12 (2.8)                                           | 68 (2.6)                       | 13.50                             | 185,716                       | 13,756.74                                              |
| Portuaria           | 10 (0.5)                                        | 2 (0.5)                                            | 12 (0.5)                       | 8.45                              | 48,664                        | 5,759.05                                               |
| Ramos               | 79 (3.6)                                        | 16 (3.8)                                           | 95 (3.6)                       | 11.18                             | 153,177                       | 13,700.98                                              |
| Realengo            | 53 (2.4)                                        | 11 (2.6)                                           | 64 (2.4)                       | 43.17                             | 243,006                       | 5,629.05                                               |
| Rio Comprido        | 22 (1)                                          | 4 (0.9)                                            | 26 (1)                         | 4.50                              | 78,975                        | 17,550.00                                              |
| Rocinha             | 3 (0.1)                                         | 0 (0)                                              | 3 (0.1)                        | 0.46                              | 69,356                        | 150,773.91                                             |
| Santa Cruz          | 67 (3)                                          | 7 (1.6)                                            | 74 (2.8)                       | 161.17                            | 368,534                       | 2,286.62                                               |
| Santa Teresa        | 19 (0.9)                                        | 3 (0.7)                                            | 22 (0.8)                       | 1.85                              | 40,926                        | 22,122.16                                              |
| Sao Cristovao       | 36 (1.6)                                        | 7 (1.6)                                            | 43 (1.6)                       | 6.79                              | 11,975                        | 1,763.62                                               |
| Tijuca              | 21 (0.9)                                        | 10 (2.4)                                           | 31 (1.2)                       | 6.67                              | 181,653                       | 27,234.33                                              |
| Vigario Geral       | 52 (2.3)                                        | 11 (2.6)                                           | 63 (2.4)                       | 11.33                             | 136,171                       | 12,018.62                                              |
| Vila Isbael         | 43 (1.9)                                        | 3 (0.7)                                            | 46 (1.7)                       | 8.06                              | 189,310                       | 23,487.59                                              |
| Belford Roxo        | 91 (4.1)                                        | 6 (1.4)                                            | 97 (3.7)                       | 77.82                             | 469,332                       | 6,031.38                                               |
| Duque De Caxias     | 167 (7.5)                                       | 30 (7.1)                                           | 197 (7.5)                      | 467.62                            | 855,048                       | 1,828.51                                               |

|                    |           |          |           |        |         |           |
|--------------------|-----------|----------|-----------|--------|---------|-----------|
| Guapimirim         | 4 (0.2)   | 0 (0)    | 4 (0.2)   | 360.78 | 51,483  | 142.70    |
| Itaborai           | 9 (0.4)   | 2 (0.5)  | 11 (0.4)  | 430.38 | 218,008 | 506.55    |
| Itaguaí            | 8 (0.4)   | 1 (0.2)  | 9 (0.3)   | 275.87 | 109,091 | 395.45    |
| Japeri             | 10 (0.5)  | 1 (0.2)  | 11 (0.4)  | 81.87  | 95,492  | 1,166.37  |
| Mage               | 20 (0.9)  | 1 (0.2)  | 21 (0.8)  | 388.50 | 227,322 | 585.13    |
| Maricá             | 9 (0.4)   | 1 (0.2)  | 10 (0.4)  | 363.08 | 127,641 | 351.55    |
| Mesquita           | 21 (0.9)  | 4 (0.9)  | 25 (0.9)  | 39.06  | 168,376 | 4,310.48  |
| Nilópolis          | 33 (1.5)  | 5 (1.2)  | 38 (1.4)  | 19.39  | 157,425 | 8,117.62  |
| Niterói            | 29 (1.3)  | 8 (1.9)  | 37 (1.4)  | 133.92 | 487,562 | 3,640.80  |
| Nova Iguaçu        | 191 (8.6) | 38 (8.9) | 229 (8.7) | 520.59 | 795,257 | 1,527.60  |
| Paracambi          | 4 (0.2)   | 2 (0.5)  | 6 (0.2)   | 179.68 | 47,124  | 262.27    |
| Queimados          | 14 (0.6)  | 5 (1.2)  | 19 (0.7)  | 75.60  | 137,792 | 1,822.60  |
| São Gonçalo        | 54 (2.4)  | 8 (1.9)  | 62 (2.3)  | 247.71 | 999,728 | 4,035.90  |
| São João de Meriti | 83 (3.7)  | 20 (4.7) | 103 (3.9) | 35.22  | 458,673 | 13,024.56 |
| Seropédica         | 4 (0.2)   | 1 (0.2)  | 5 (0.2)   | 283.77 | 78,186  | 275.53    |

**Supplementary Table II** Neighborhood socioeconomic status among included and excluded participants

|                         | <b>Participants included in analysis</b><br>n= 2639 (72.7%) | <b>Participants excluded for missing viral load</b><br>n= 992 (27.3%) | <b>Total</b><br>n= 3631 (100%) | <b>Test statistic</b><br>(chi-square) | <b>P value</b> |
|-------------------------|-------------------------------------------------------------|-----------------------------------------------------------------------|--------------------------------|---------------------------------------|----------------|
| <b>MHDI (IQR)</b>       | 0.683 (0.587, 0.758)                                        | 0.685 (0.586, 0.766)                                                  | 0.683 (0.587, 0.762)           |                                       | 0.58           |
| <b>MHDI category</b>    |                                                             |                                                                       |                                | 3.56 (2df)                            | 0.17           |
| High- Very High         | 1138 (43.1)                                                 | 443 (44.7)                                                            | 1581 (43.5)                    |                                       |                |
| Medium                  | 761 (28.8)                                                  | 255 (25.7)                                                            | 1016 (28.0)                    |                                       |                |
| Very low- low           | 740 (28.0)                                                  | 294 (29.6)                                                            | 1034 (28.5)                    |                                       |                |
| <b>SVI median (IQR)</b> | 0.301 (0.226, 0.362)                                        | 0.299 (0.220, 0.365)                                                  | 0.299 (0.223, 0.364)           |                                       | 0.36           |
| <b>SVI category</b>     |                                                             |                                                                       |                                | 1.17 (2df)                            | 0.57           |
| Low- Very Low           | 1314 (49.9)                                                 | 503 (51.0)                                                            | 1817 (50.2)                    |                                       |                |
| Medium                  | 938 (35.6)                                                  | 333 (33.8)                                                            | 1271 (35.1)                    |                                       |                |
| High- Very High         | 389 (14.4)                                                  | 150 (15.2)                                                            | 530 (14.6)                     |                                       |                |

**Supplementary Figure I** Study participant flow chart

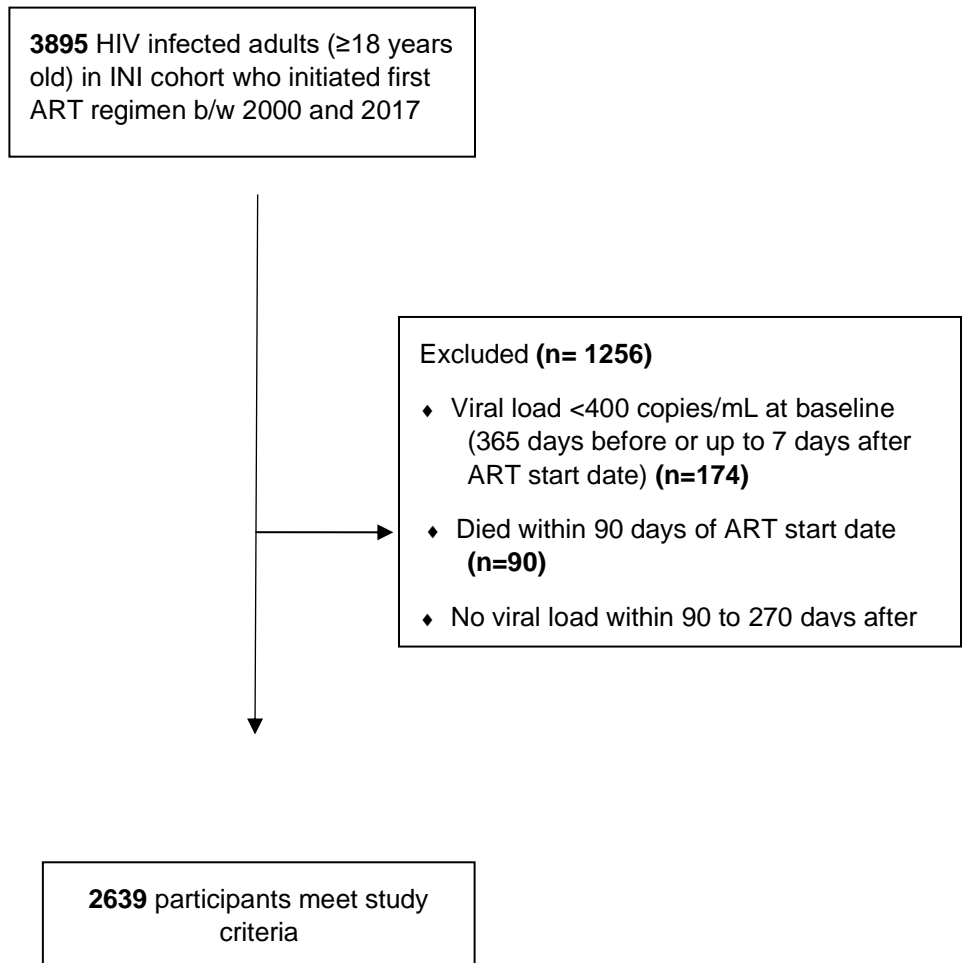

**Supplementary Figure II** Percentage of participants achieving viral suppression as a function of ART initiation year

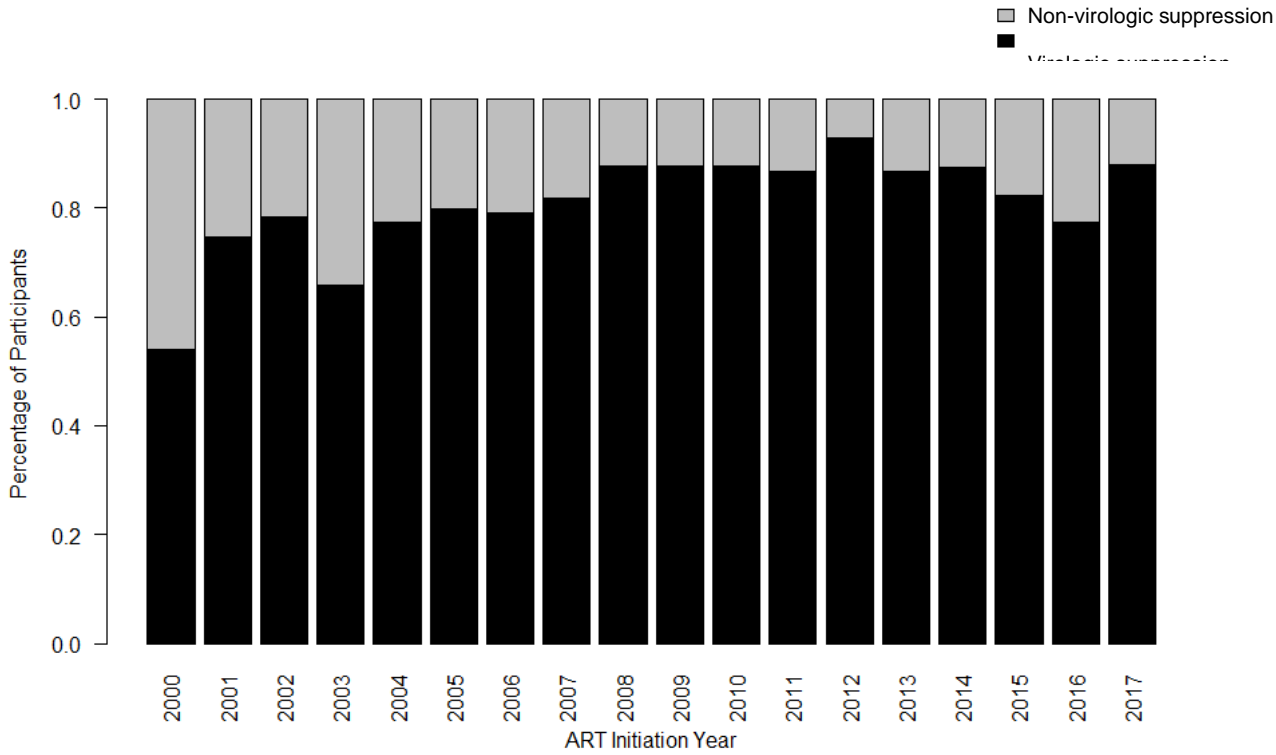

Supplement: NIHMS1783038-supplement-1.pdf [file NIHMS1783038-supplement-1.pdf]
